# Supplementary material
Source: HighWire-hosted journal article supplement (https://www.highwirestage.com/highwire/filestream/71160/field_highwire_adjunct_files/0/19-00627.pdf)
Supplement: 19-00627.pdf [file 19-00627.pdf]

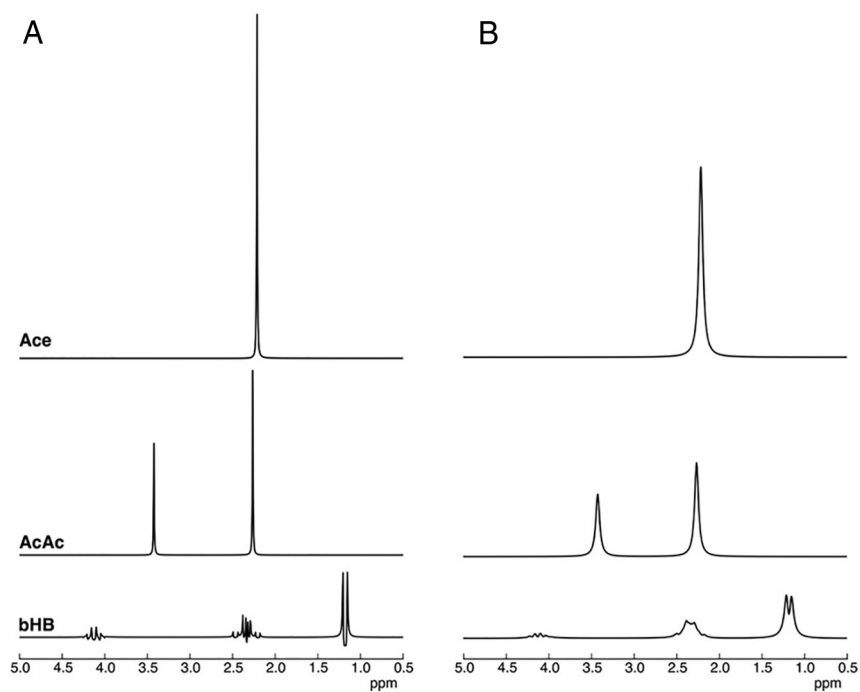

**ON-LINE FIG 1.** Simulated basis spectra (at *A*, 1-Hz line width. *B*, 6-Hz line width) used for fitting ketone bodies AcAc, Ace, and bHB, which were incorporated into LCModel fitting. Simulations are for a semi-LASER acquisition with TE = 34 ms.

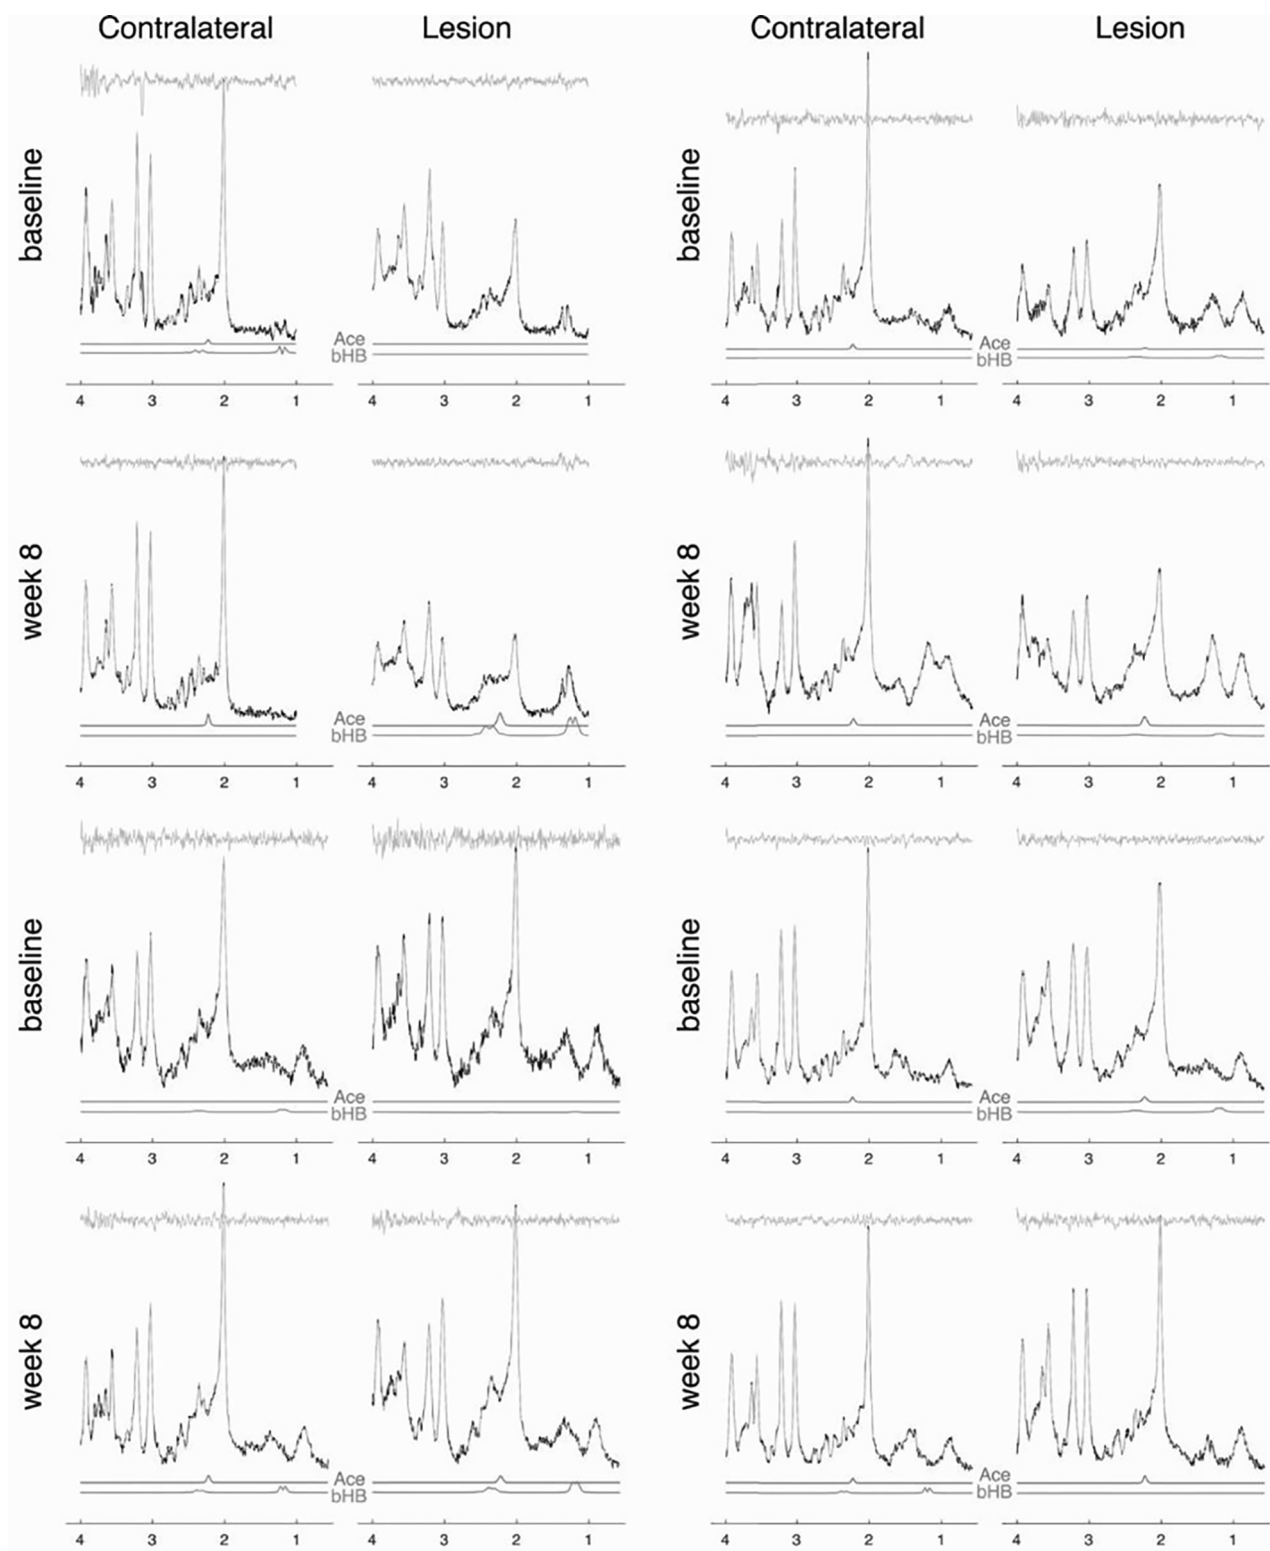

**ON-LINE FIG 2.** Patient spectra.

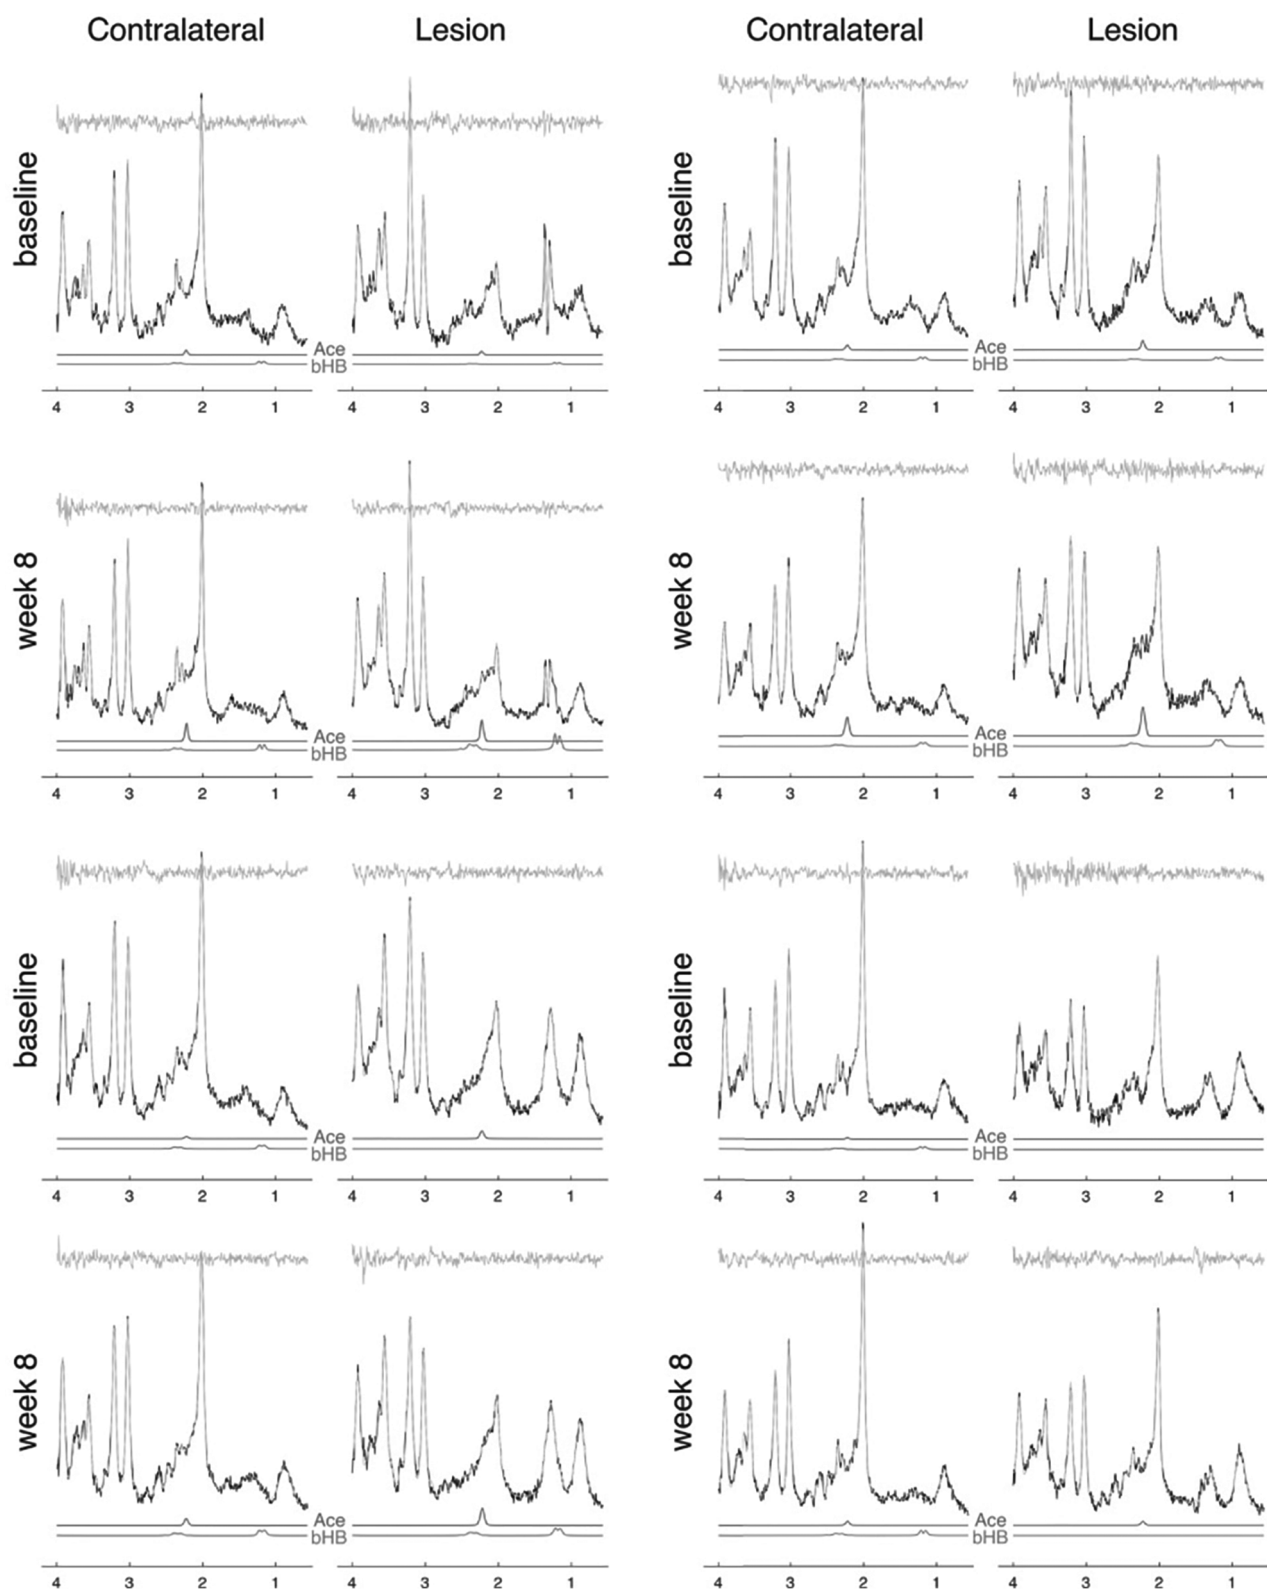

ON-LINE FIG 2. continued

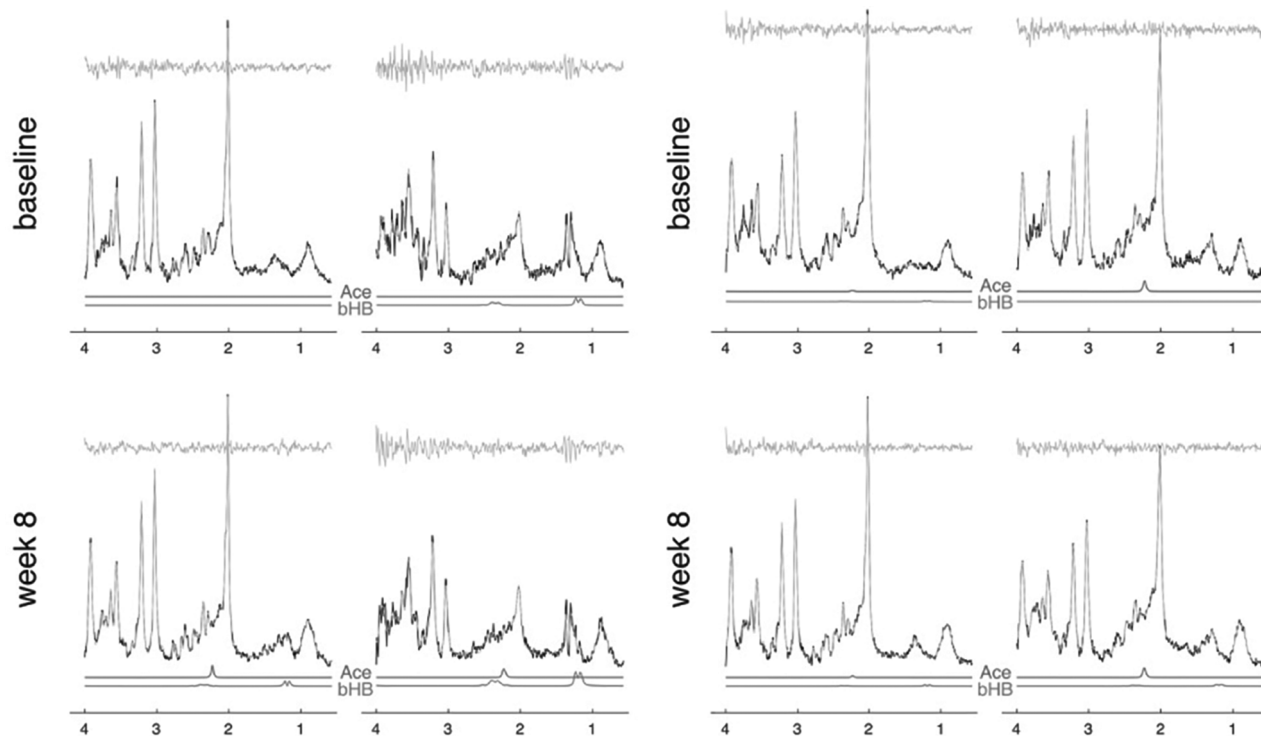

**ON-LINE FIG 2.** continued

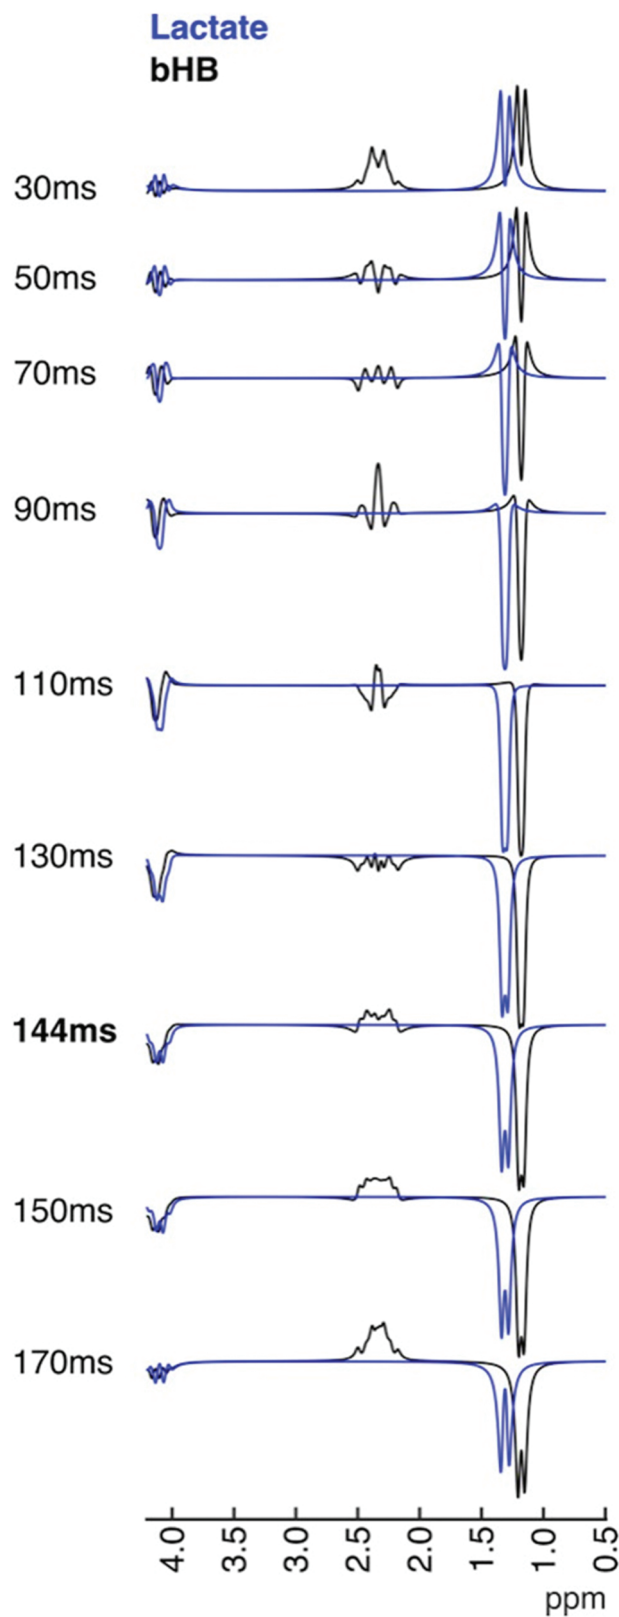

**ON-LINE FIG 3.** Simulated spectral patterns for equimolar concentrations of lactate and bHB at varying TEs (30–170 ms), neglecting T2 decay. The methyl groups in bHB and Lac behave very similarly as a function of TE, given the J-coupling constants of 6.3 and 6.94 Hz, respectively. There is no optimum TE to separate bHB and Lac; however, they are resolvable at 3T with the 6-Hz Lorentzian line widths shown here. Simulations were performed using an ideal point-resolved spectroscopic sequence localization; 144 ms indicates the TE commonly used for detection of lactate.
